# Supplementary material for: Self-Decoration of PtNi Alloy Nanoparticles on Multiwalled Carbon Nanotubes for Highly Efficient Methanol Electro-Oxidation
Source: PubMed Central journal article supplement (PMC6223686; doi:10.1007/s40820-016-0096-2), 2016-07-01
Supplement: 40820_2016_96_MOESM1_ESM.pdf [file 40820_2016_96_MOESM1_ESM.pdf]

Supporting Information for

## Self-Decoration of PtNi Alloy Nanoparticles on Multi-Walled Carbon Nanotubes for Highly Efficient Methanol Electro-Oxidation

Yu-Yan Zhou<sup>1</sup>, Chang-Hai Liu<sup>2,\*</sup>, Jie Liu<sup>1</sup>, Xin-Lei Cai<sup>1</sup>, Ying Lu<sup>1</sup>, Hui Zhang<sup>1</sup>,

Xu-Hui Sun<sup>1</sup>, Sui-Dong Wang<sup>1,\*</sup>

<sup>1</sup>Institute of Functional Nano & Soft Materials (FUNSOM), Jiangsu Key Laboratory for Carbon-Based Functional Materials & Devices, Soochow University, Suzhou, Jiangsu 215123, People's Republic of China

<sup>2</sup>School of Materials Science & Engineering, Changzhou University, Changzhou, Jiangsu 213164, People's Republic of China

\* Corresponding author. E-mail: wangsd@suda.edu.cn, liuch@cczu.edu.cn

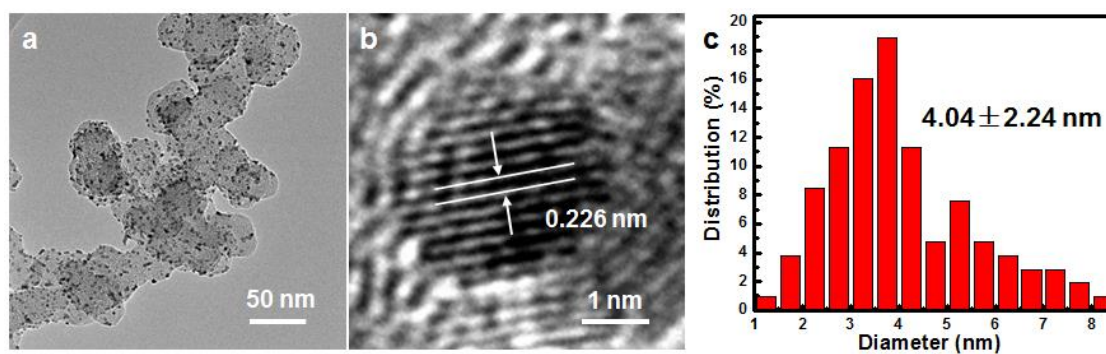

Fig. S1 **a** TEM image, **b** HRTEM image, and **c** NP size distribution of commercial Pt/C catalyst
